# Supplementary material for: The ComX Quorum Sensing Peptide of Bacillus subtilis Affects Biofilm Formation Negatively and Sporulation Positively
Source: MDPI journal article supplement (doi:10.3390/microorganisms8081131), 2020-07-27
Supplement: s1 [file s1]

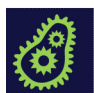

Supplementary Materials:

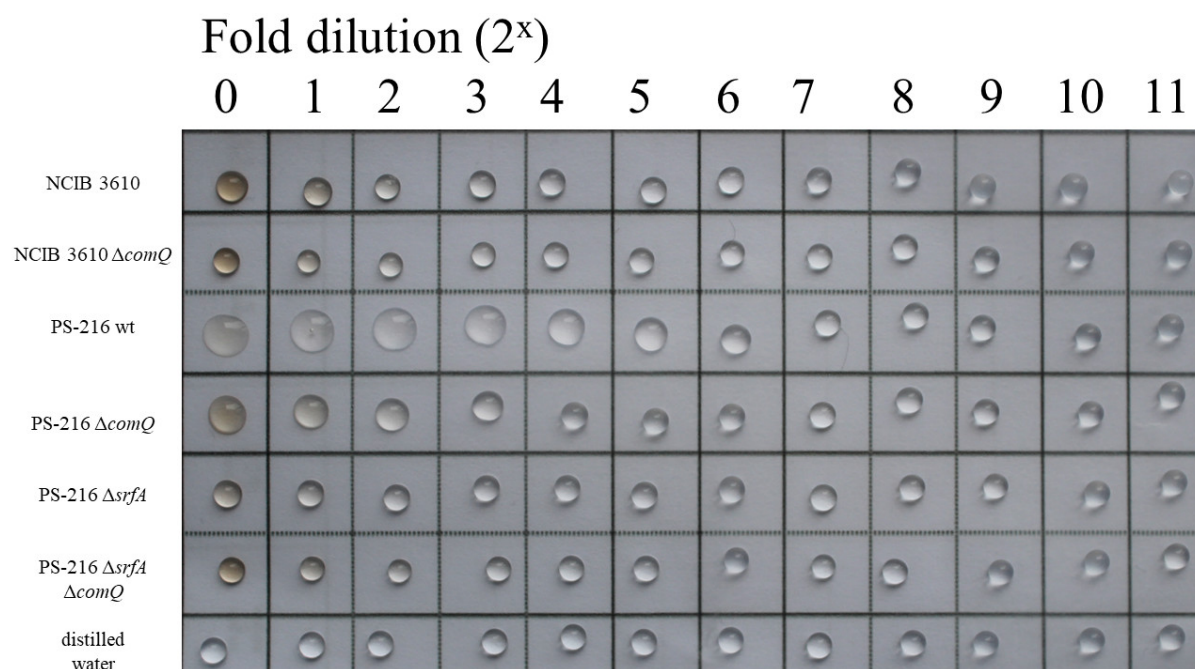

**Figure S1:** Semi quantification of surfactant concentrations in the pellicle biofilm spent media after 40 h of static growth in MSgg medium at 37 °C using a droplet surface wetting assay

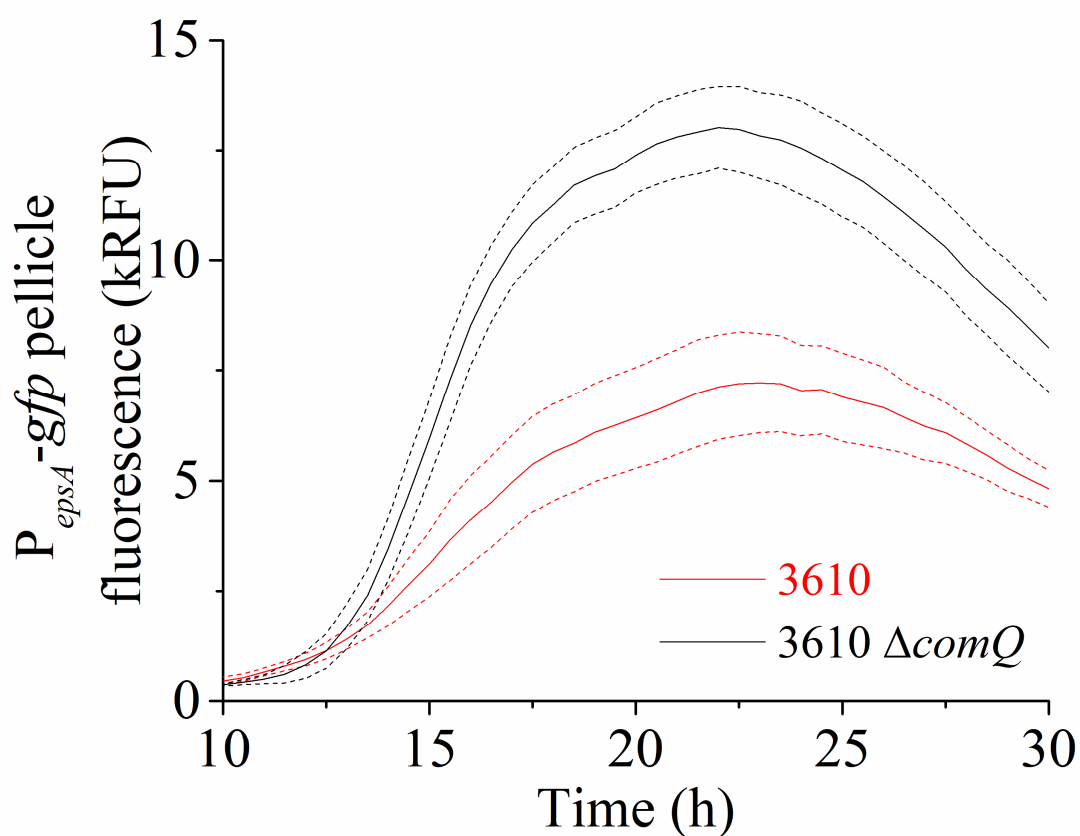

**Figure S2.** Bulk pellicle fluorescence measurements of the  $P_{epsA}$ -gfp reporter activity of *Bacillus subtilis* NCIB 3610 wild type (wt) and QS mutant ( $\Delta comQ$ ) phenotypes during static growth in MSgg medium at 37 °C. Averages of three biological replicates are shown. Statistical significance was determined by calculating the 95% confidence interval (dashed line);

Table S1

| Transcriptional reporter | Excitation wavelength [nm] | Emission wavelength [nm] | Gain |
|--------------------------|----------------------------|--------------------------|------|
| $P_{epsA}$ -gfp          | 480                        | 510                      | 100  |
| $P_{lapA}$ -yfp          | 500                        | 530                      | 80   |
| $P_{spoIIQ}$ -yfp        | 500                        | 530                      | 80   |
| $P_{43}$ -mKate2         | 570                        | 620                      | 100  |

**Table S1:** Emission and excitation wavelengths and gain settings for transcriptional reporters used in this study,

Table S2

| Transcriptional reporter | Excitation Laser wavelength [nm] | Emission filter [nm] | Laser power [%] | Master gain [v] | Pinhole [ $\mu\text{m}$ ] |
|--------------------------|----------------------------------|----------------------|-----------------|-----------------|---------------------------|
| <b>BM1631 and BM1622</b> |                                  |                      |                 |                 |                           |
| $P_{epsA}\text{-gfp}$    | 488                              | 400-580              | 15              | 650             | 71                        |
| $P_{43}\text{-mKate2}$   | 561                              | 585-700              | 2.5             | 600             | 84                        |
| <b>BM1613 and BM1614</b> |                                  |                      |                 |                 |                           |
| $P_{tapA}\text{-yfp}$    | 488                              | 400-590              | 7               | 600             | 72                        |
| $P_{43}\text{-mKate2}$   | 561                              | 590-700              | 2.5             | 600             | 86                        |
| <b>BM1625 and BM1626</b> |                                  |                      |                 |                 |                           |
| $P_{spoIIQ}\text{-yfp}$  | 488                              | 400-590              | 7               | 600             | 72                        |
| $P_{43}\text{-mKate2}$   | 561                              | 590-700              | 2.5             | 600             | 86                        |

**Table S2:** Confocal laser scanning microscope settings for different transcriptional reporters used in this study;

<https://www.youtube.com/watch?v=1FRfrhZIPKY&feature=youtu.be>

**Video S1:** Fast forward video showing diffusion of the 50  $\mu$ L methylene blue droplet placed on the PS-216 wild type (wt) or QS mutant ( $\Delta comQ$ ) pellicle biofilms grown statically in MSgg medium at 37 °C for the time periods indicated on the video, <https://www.youtube.com/watch?v=1FRfrhZIPKY&feature=youtu.be>. Upload date: 17.9.2018.
